# Supplementary material for: MZF1 Transcriptionally Activated MicroRNA-328-3p Suppresses the Malignancy of Stomach Adenocarcinoma via Inhibiting CD44
Source: Hindawi journal article supplement (doi:10.1155/2022/5819295), 2022-05-28

**A**

### Comparison of CD44 Across 11 Analyses

Over-expression

| Median Rank | p-Value | Gene |   |   |   |   |   |   |   |   |   |    |    |
|-------------|---------|------|---|---|---|---|---|---|---|---|---|----|----|
| 1403.0      | 0.002   | CD44 |   |   |   |   |   |   |   |   |   |    |    |
|             |         |      | 1 | 2 | 3 | 4 | 5 | 6 | 7 | 8 | 9 | 10 | 11 |

#### Legend

1. Diffuse Gastric Adenocarcinoma vs. Normal  
*Chen Gastric, Mol Biol Cell, 2003*
2. Gastric Intestinal Type Adenocarcinoma vs. Normal  
*Chen Gastric, Mol Biol Cell, 2003*
3. Gastric Mixed Adenocarcinoma vs. Normal  
*Chen Gastric, Mol Biol Cell, 2003*
4. Diffuse Gastric Adenocarcinoma vs. Normal  
*Cho Gastric, Clin Cancer Res, 2011*
5. Gastric Intestinal Type Adenocarcinoma vs. Normal  
*Cho Gastric, Clin Cancer Res, 2011*
6. Gastric Mixed Adenocarcinoma vs. Normal  
*Cho Gastric, Clin Cancer Res, 2011*
7. Gastric Cancer vs. Normal  
*Cui Gastric, Nucleic Acids Res, 2011*
8. Diffuse Gastric Adenocarcinoma vs. Normal  
*DErrico Gastric, Eur J Cancer, 2009*
9. Gastric Intestinal Type Adenocarcinoma vs. Normal  
*DErrico Gastric, Eur J Cancer, 2009*
10. Gastric Mixed Adenocarcinoma vs. Normal  
*DErrico Gastric, Eur J Cancer, 2009*
11. Gastric Cancer vs. Normal  
*Wang Gastric, Med Oncol, 2010*

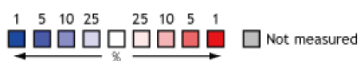

The rank for a gene is the median rank for that gene across each of the analyses.  
The p-Value for a gene is its p-Value for the median-ranked analysis.

**B**

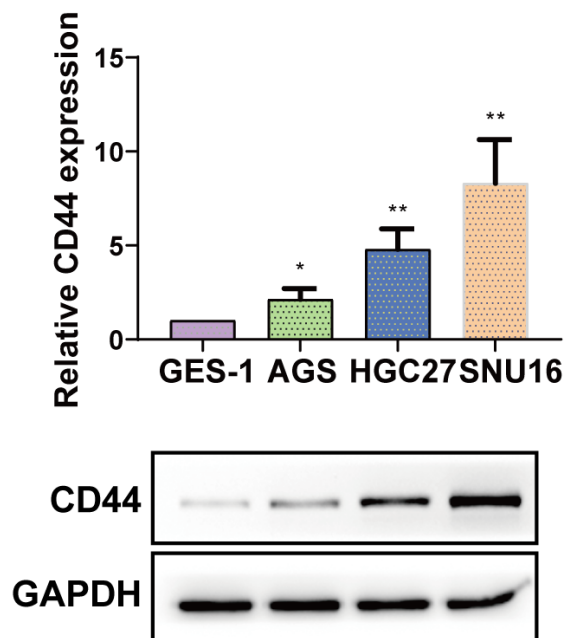

Supplement: f1 [file 5819295.f1.zip]
