# Supplementary material for: MZF1 Transcriptionally Activated MicroRNA-328-3p Suppresses the Malignancy of Stomach Adenocarcinoma via Inhibiting CD44
Source: Hindawi journal article supplement (doi:10.1155/2022/5819295), 2022-05-28
Supplement: f1 [file 5819295.f1.zip]

**Supplementary Table 1. Sequences of siRNA Against Specific Targets**

|           |       |                         |
|-----------|-------|-------------------------|
| si-CD44-1 | 5'-3' | CCCAGTATGACACATATTGCTTC |
| si-CD44-2 | 5'-3' | ATCTTTTACACCTTTTCTACTGT |
| si-MZF1-1 | 5'-3' | CCCAGTATGACACATATTGCTTC |
| si-MZF1-2 | 5'-3' | TGGTTTTCATGGTTGTTTCTACC |

**Supplementary Table 2. Sequences of PCR primers used in this study**

|               |                |                            |
|---------------|----------------|----------------------------|
| CD44          | Forward(5'-3') | CTGCCGCTTTGCAGGTGTA        |
|               | Reverse(5'-3') | CATTGTGGGCAAGGTGCTATT      |
| hsa-miR-328-3 | Forward(5'-3') | GCCCTCTCTGCCCTTC           |
| p             | Reverse(5'-3') | GTCCAGTTTTTTTTTTTTTTTACGGA |
| U6            | Forward(5'-3') | CGCTTC ACGAATTTGCGTGTCAT   |
|               | Reverse(5'-3') | GCTTCGGCAGCACATATACTAAAAT  |
| GAPDH         | Forward(5'-3') | GGAGCGAGATCCCTCCAAAAT      |
|               | Reverse(5'-3') | GGCTGTTGTCATACTTCTCATGG    |

**Supplementary Table 3. Cox regression analysis of the relationship between 34 overlapped genes and prognostic parameters**

| Characteristic | Total(N) | HR(95% CI)<br>Univariate analysis | P value<br>Univariate analysis | HR(95% CI)<br>Multivariate analysis | P value<br>Multivariate analysis |
|----------------|----------|-----------------------------------|--------------------------------|-------------------------------------|----------------------------------|
| ADNP           | 349      | 1.080 (0.795-1.466)               | 0.623                          |                                     |                                  |
| AEBP2          | 349      | 1.270 (0.919-1.755)               | 0.148                          |                                     |                                  |
| AGO1           | 349      | 1.049 (0.773-1.423)               | 0.759                          |                                     |                                  |
| ALDH1B1        | 349      | 0.993 (0.820-1.203)               | 0.942                          |                                     |                                  |
| APP            | 349      | 0.985 (0.727-1.336)               | 0.925                          |                                     |                                  |
| ARL6IP1        | 349      | 1.104 (0.839-1.453)               | 0.478                          |                                     |                                  |
| CBX4           | 349      | 1.181 (0.911-1.530)               | 0.21                           |                                     |                                  |
| CD44           | 349      | 1.197 (1.007-1.423)               | 0.041                          | 1.204(1.012-1.432)                  | 0.036                            |
| DYNLL1         | 349      | 1.615 (0.977-2.670)               | 0.062                          |                                     |                                  |
| GDI2           | 349      | 0.847 (0.573-1.251)               | 0.404                          |                                     |                                  |
| PKM            | 349      | 1.053 (0.814-1.363)               | 0.693                          |                                     |                                  |
| POLR3G         | 349      | 0.870 (0.665-1.140)               | 0.313                          |                                     |                                  |
| RAD51          | 349      | 0.887 (0.687-1.146)               | 0.36                           |                                     |                                  |
| SCD            | 349      | 1.064 (0.929-1.219)               | 0.369                          |                                     |                                  |
| SLC25A40       | 349      | 0.953 (0.668-1.358)               | 0.789                          |                                     |                                  |

|         |     |                     |       |
|---------|-----|---------------------|-------|
| SMC1A   | 349 | 0.801 (0.583-1.100) | 0.171 |
| TMEM33  | 349 | 0.874 (0.637-1.199) | 0.404 |
| TOMM40  | 349 | 0.955 (0.737-1.239) | 0.731 |
| H2AX    | 349 | 0.936 (0.744-1.177) | 0.572 |
| HMGB1   | 349 | 0.858 (0.585-1.259) | 0.435 |
| HNRNPF  | 349 | 0.753 (0.531-1.067) | 0.11  |
| IRAK1   | 349 | 0.809 (0.625-1.048) | 0.109 |
| MKI67   | 349 | 0.932 (0.771-1.126) | 0.466 |
| RAB43   | 349 | 0.982 (0.716-1.348) | 0.912 |
| SCAMP2  | 349 | 0.968 (0.687-1.365) | 0.855 |
| SERBP1  | 349 | 0.855 (0.569-1.285) | 0.452 |
| SKA1    | 349 | 0.887 (0.715-1.102) | 0.279 |
| SLC7A1  | 349 | 0.869 (0.672-1.124) | 0.285 |
| STT3A   | 349 | 0.940 (0.675-1.309) | 0.716 |
| TAPBP   | 349 | 1.057 (0.773-1.446) | 0.729 |
| TMOD3   | 349 | 1.150 (0.799-1.655) | 0.45  |
| VPS53   | 349 | 0.986 (0.668-1.457) | 0.945 |
| YWHAQ   | 349 | 1.096 (0.743-1.616) | 0.644 |
| ZC3H12D | 349 | 0.936 (0.738-1.185) | 0.582 |
