# Supplementary material for: MZF1 Transcriptionally Activated MicroRNA-328-3p Suppresses the Malignancy of Stomach Adenocarcinoma via Inhibiting CD44
Source: J Immunol Res. 2022 May 28;2022:5819295. doi: 10.1155/2022/5819295 (PMC9167131; doi:10.1155/2022/5819295)
Supplement: Supplementary Materials — Supplementary Table 1: sequences of siRNA against specific targets. Supplementary Table 2: sequences of PCR primers used in this study. Supplementary Table 3: Cox regression analysis of the relationship between 34 overlapped genes and prognostic parameters. Supplementary Figure 1: CD44 expression levels in STAD tissues and cells. (A) The analysis of GC dataset in Oncomine database revealed the expression level of CD44 in STAD tissues. (B) qRT-PCR and Western blot detection of CD44 expression level in STAD and normal cells. All experiments were performed in triplicate. ∗P < 0.05, ∗∗P < 0.01. [file 5819295.f1.zip]

Archive with 2 entries (2 files):
- 5819295.f1/Supplementary Figure 1.pdf
- 5819295.f1/Supplementary tables.pdf
